# Supplementary material for: Multi-state nonadiabatic deactivation mechanism of coumarin revealed by ab initio on-the-fly trajectory surface hopping dynamic simulation
Source: Royal Society of Chemistry journal article supplement (doi:10.1039/c6cp08929a), 2017-01-01
Supplement: c6cp08929a1.pdf [file c6cp08929a1.pdf]

**Multi-state nonadiabatic deactivation mechanism of coumarin revealed by  
ab initio on-the-fly trajectory surface hopping dynamic simulation**

**Supporting Information**

Yanzhen Gan,<sup>a</sup> Ling Yue,<sup>b</sup> Xugeng Guo,<sup>c</sup> Chaoyuan Zhu<sup>\*ad</sup> and Zexing Cao<sup>\*e</sup>

<sup>a</sup>Key State Key Laboratory for Physical Chemistry of Solid Surfaces and Fujian Province Key Lab of Theoretical and Computational Chemistry, College of Chemistry and Chemical Engineering, Xiamen University, Xiamen 361005, P. R. China

<sup>b</sup>MOE Key Laboratory for Nonequilibrium Synthesis and Modulation of Condensed Matter, State Key Laboratory for Mechanical Behavior of Materials, and Institute of Chemistry for New Energy Materials, Department of Chemistry, Faculty of Science, Xi'an Jiaotong University, Xi'an 710049, P. R. China.

<sup>c</sup>Institute of Theoretical Chemistry, College of Chemistry and Chemical Engineering, Henan University, Kaifeng 475004, P. R. China.

<sup>d</sup>Institute of Molecular Science, Department of Applied Chemistry and Center for Interdisciplinary Molecular Science, National Chiao Tung University, Hsinchu 30010, Taiwan

\*E-mail: cyzhu@mail.nctu.edu.tw (C. Z) and zxcao@xmu.edu.cn (Z. C)

**Table S1.** Comparison of MP2, B3LYP, and CASSCF (12, 10) geometry optimizations with experimental crystal data for ground state of coumarin (bond lengths in Angstroms and bond angles in Degrees).

|                                                 | MP2   | B3LYP | CASSCF(12,10) | Expt. <sup>a</sup> |
|-------------------------------------------------|-------|-------|---------------|--------------------|
| O <sub>1</sub> -C <sub>2</sub>                  | 1.396 | 1.398 | 1.366         | 1.374              |
| O <sub>1</sub> -C <sub>6</sub>                  | 1.375 | 1.365 | 1.355         | 1.378              |
| C <sub>2</sub> -C <sub>3</sub>                  | 1.462 | 1.460 | 1.468         | 1.454              |
| C <sub>2</sub> =O <sub>11</sub>                 | 1.217 | 1.208 | 1.186         | 1.213              |
| C <sub>3</sub> =C <sub>4</sub>                  | 1.355 | 1.352 | 1.344         | 1.347              |
| C <sub>4</sub> -C <sub>5</sub>                  | 1.442 | 1.442 | 1.440         | 1.438              |
| C <sub>5</sub> =C <sub>6</sub>                  | 1.405 | 1.409 | 1.383         | 1.397              |
| C <sub>5</sub> -C <sub>10</sub>                 | 1.408 | 1.407 | 1.406         | 1.405              |
| C <sub>6</sub> -C <sub>7</sub>                  | 1.398 | 1.396 | 1.394         | 1.394              |
| C <sub>7</sub> =C <sub>8</sub>                  | 1.392 | 1.391 | 1.372         | 1.383              |
| C <sub>8</sub> -C <sub>9</sub>                  | 1.405 | 1.403 | 1.405         | 1.397              |
| C <sub>9</sub> =C <sub>10</sub>                 | 1.390 | 1.388 | 1.384         | 1.380              |
| C <sub>2</sub> -O <sub>1</sub> -C <sub>6</sub>  | 122.1 | 122.8 | 123.5         | 121.9              |
| O <sub>1</sub> -C <sub>2</sub> -C <sub>3</sub>  | 116.3 | 115.9 | 115.9         | 117.4              |
| O <sub>1</sub> -C <sub>2</sub> =O <sub>11</sub> | 118.2 | 117.9 | 119.0         | 116.8              |
| C <sub>2</sub> -C <sub>3</sub> =C <sub>4</sub>  | 121.9 | 121.7 | 121.2         | 121.4              |
| C <sub>3</sub> =C <sub>4</sub> -C <sub>5</sub>  | 120.4 | 120.8 | 120.4         | 120.1              |
| C <sub>4</sub> -C <sub>5</sub> =C <sub>6</sub>  | 117.5 | 117.3 | 117.6         | 118.1              |
| O <sub>1</sub> -C <sub>6</sub> =C <sub>5</sub>  | 121.8 | 121.4 | 121.4         | 121.1              |

<sup>a</sup> X-ray structure from Ref. 24.

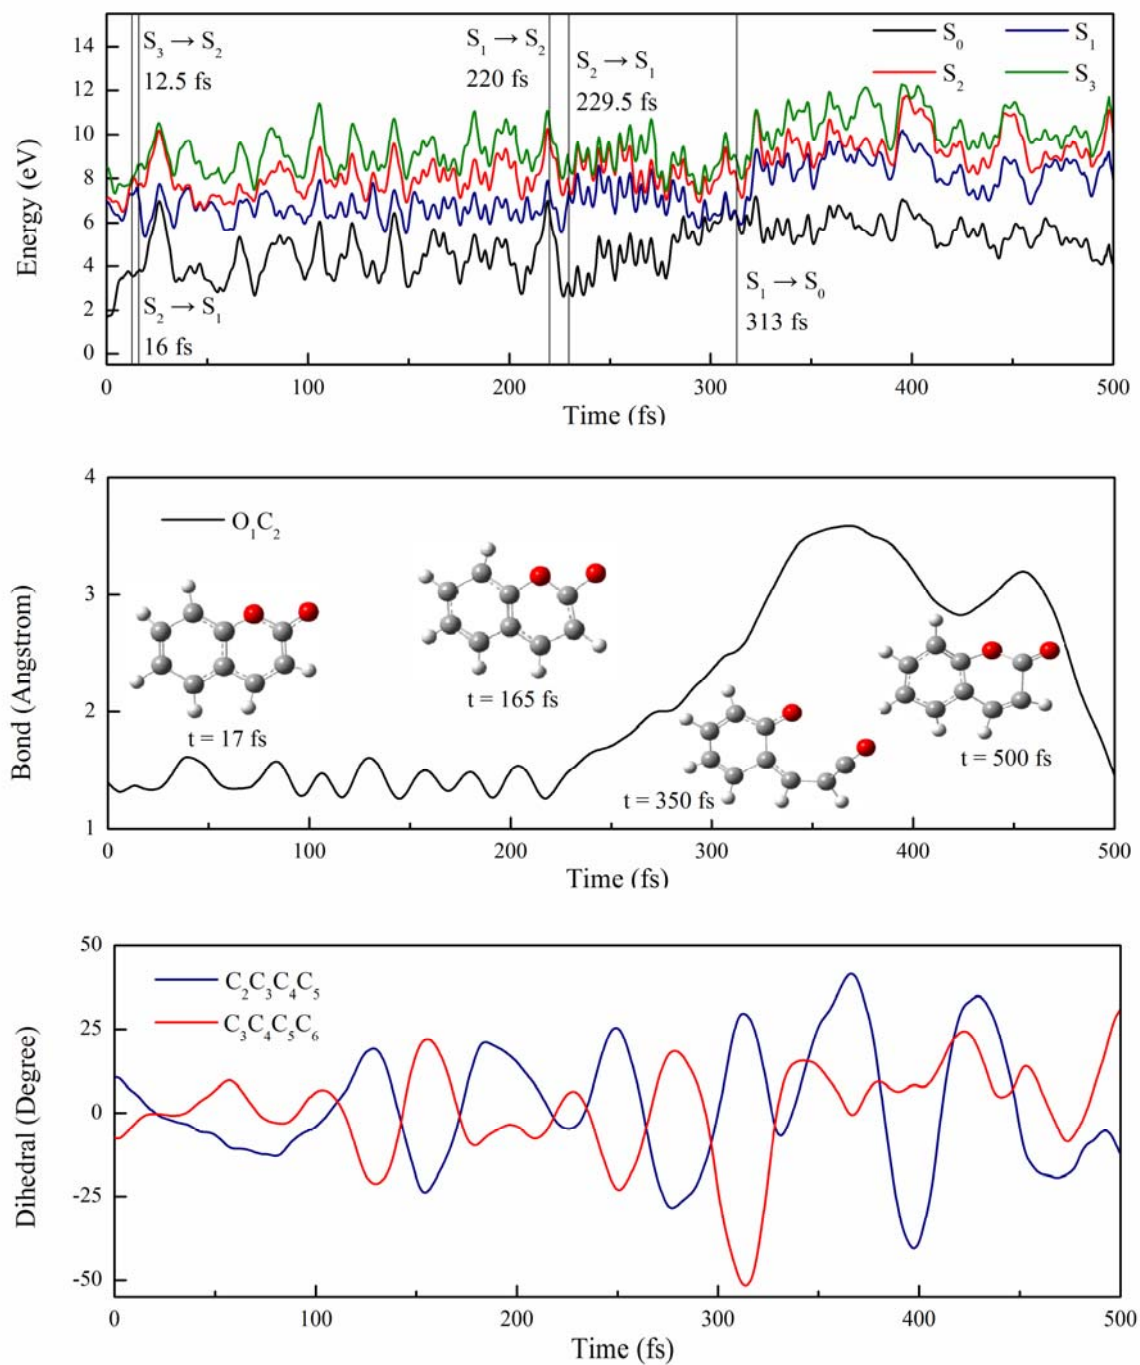

**Fig. S1** Trajectory has ring opening reaction on ground state, but close again. The upper panel is for potential energy profiles against the time, the middle panel is evolution for bond length  $O_1C_2$  and the bottom panel is for two dihedrals  $C_2C_3C_4C_5$  and  $C_3C_4C_5C_6$  (see Fig.6).

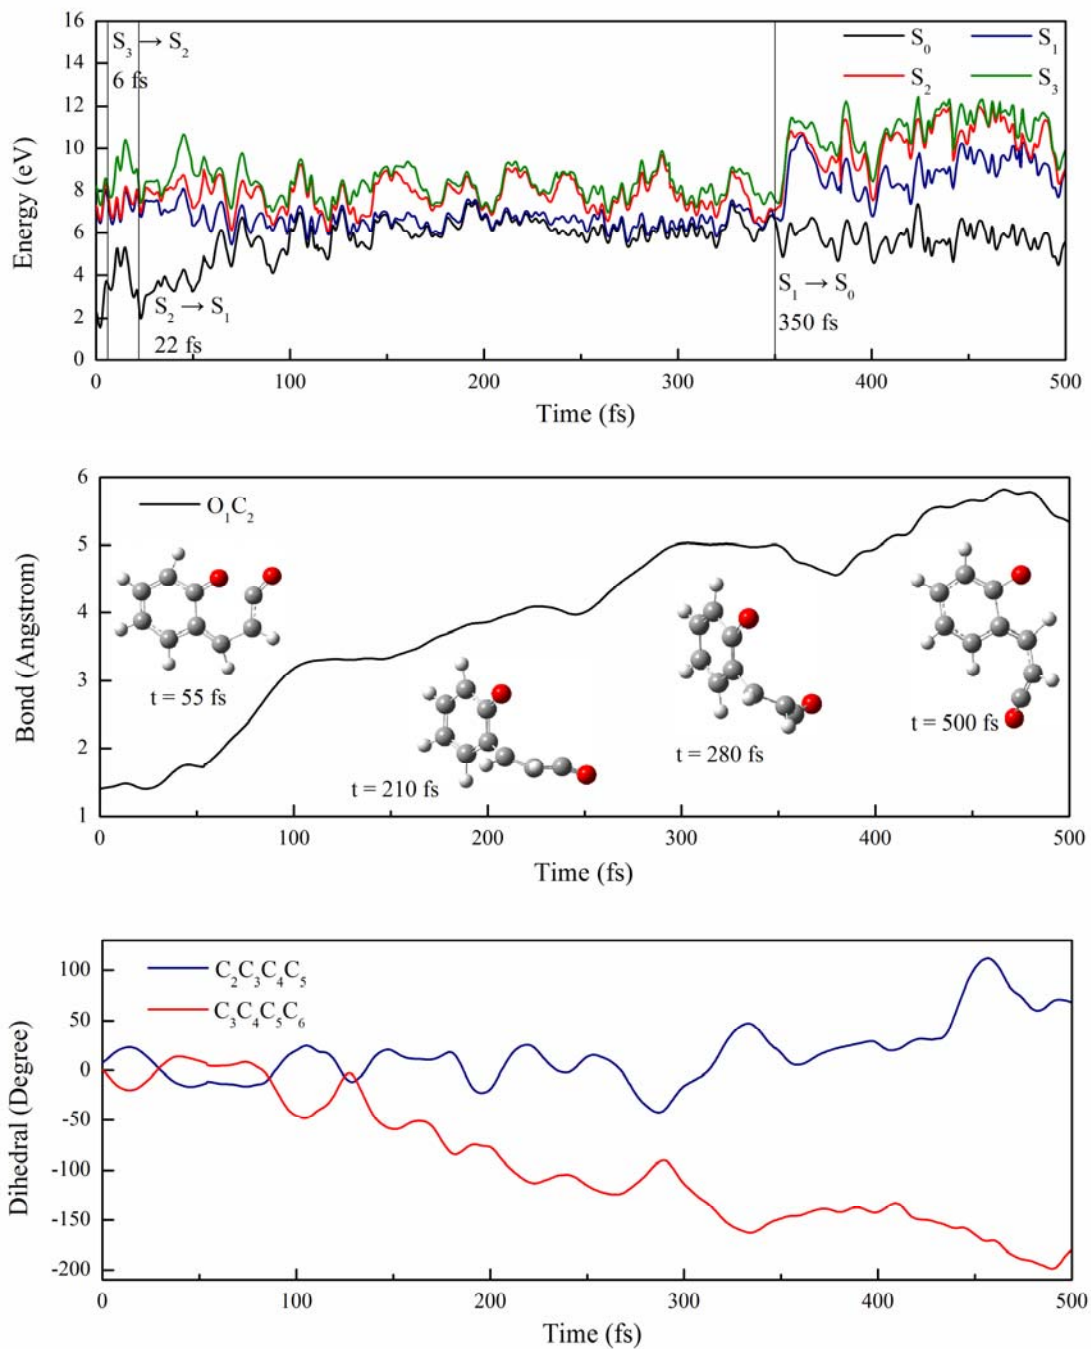

**Fig. S2** The same as Fig. S1 except for the trajectory to evolve  $S_3(\pi\pi^*L_b) \rightarrow S_3/S_2 \rightarrow S_2/S_1 \rightarrow S_1(\pi\pi^*L_a)/S_0 \rightarrow S_0 \rightarrow TS_0(E) \rightarrow S_0(E)$  (see Fig.6).

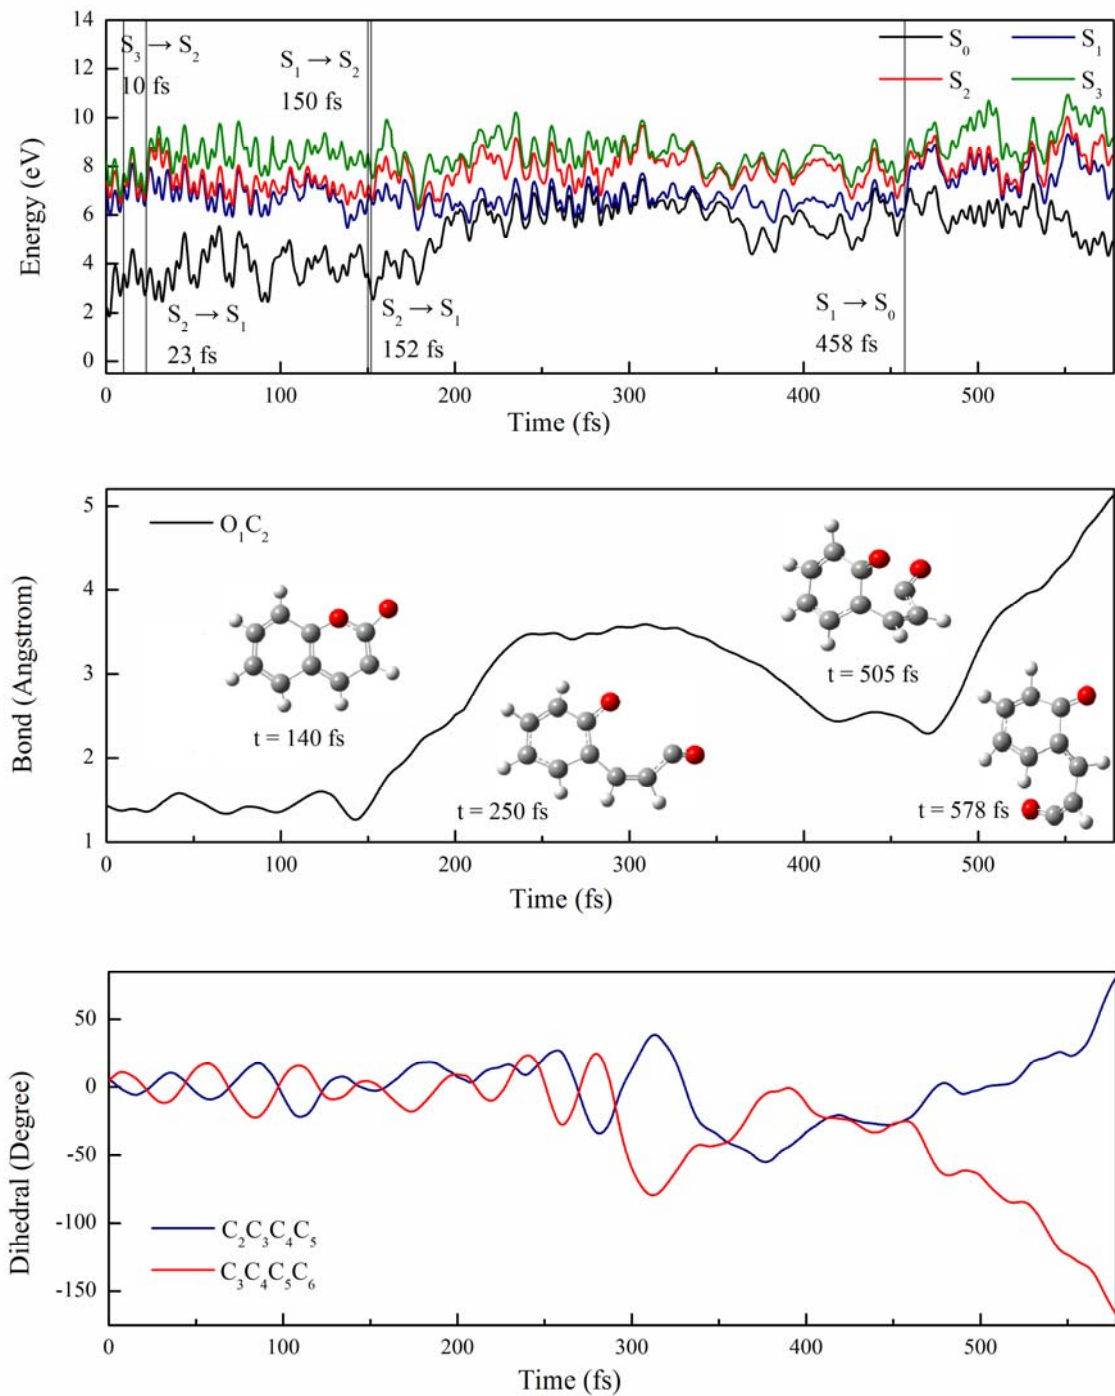

**Fig. S3** The same as Fig. S1 except for the trajectory to evolve  $S_3(\pi\pi^*L_b) \rightarrow S_3/S_2 \rightarrow S_2/S_1 \rightarrow S_1(\pi\pi^*L_a)/S_0 \rightarrow S_0 \rightarrow TS_0(E) \rightarrow S_0(E)$  (see Fig.6).

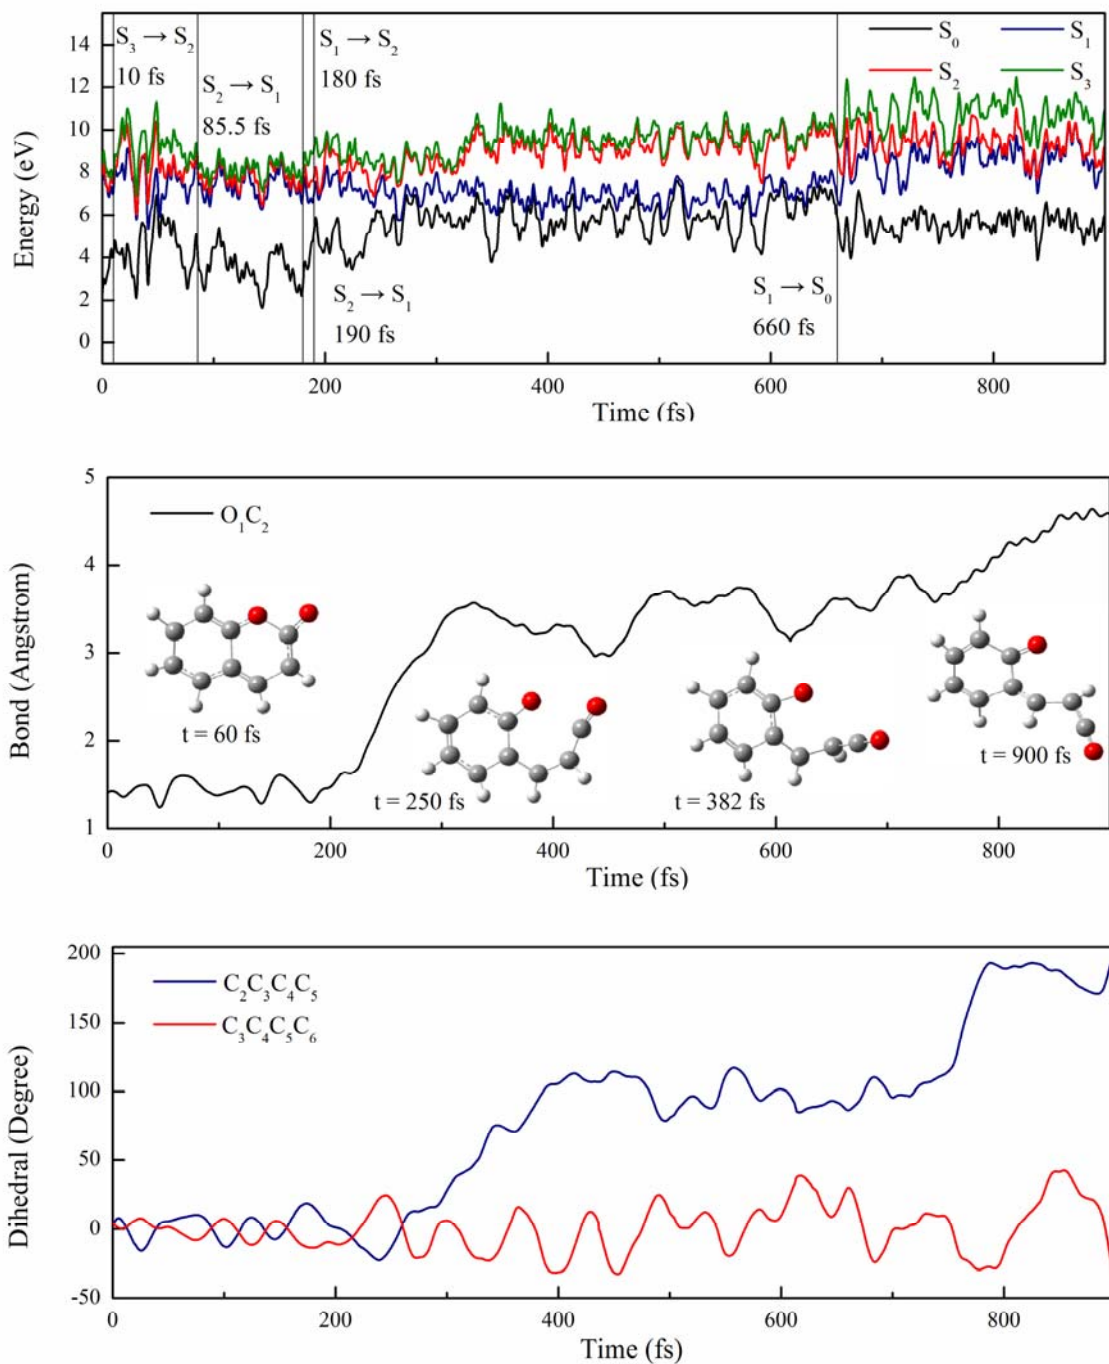

**Fig. S4** The same as Fig. S1 except for the trajectory to evolve  $S_3(\pi\pi^*L_b) \rightarrow S_3/S_2 \rightarrow S_2/S_1 \rightarrow S_1(\pi\pi^*L_a) \rightarrow TS_1(Z) \rightarrow S_1(Z) \rightarrow S_1(Z)/S_0(Z) \rightarrow S_0(Z)$  (see Fig.6).

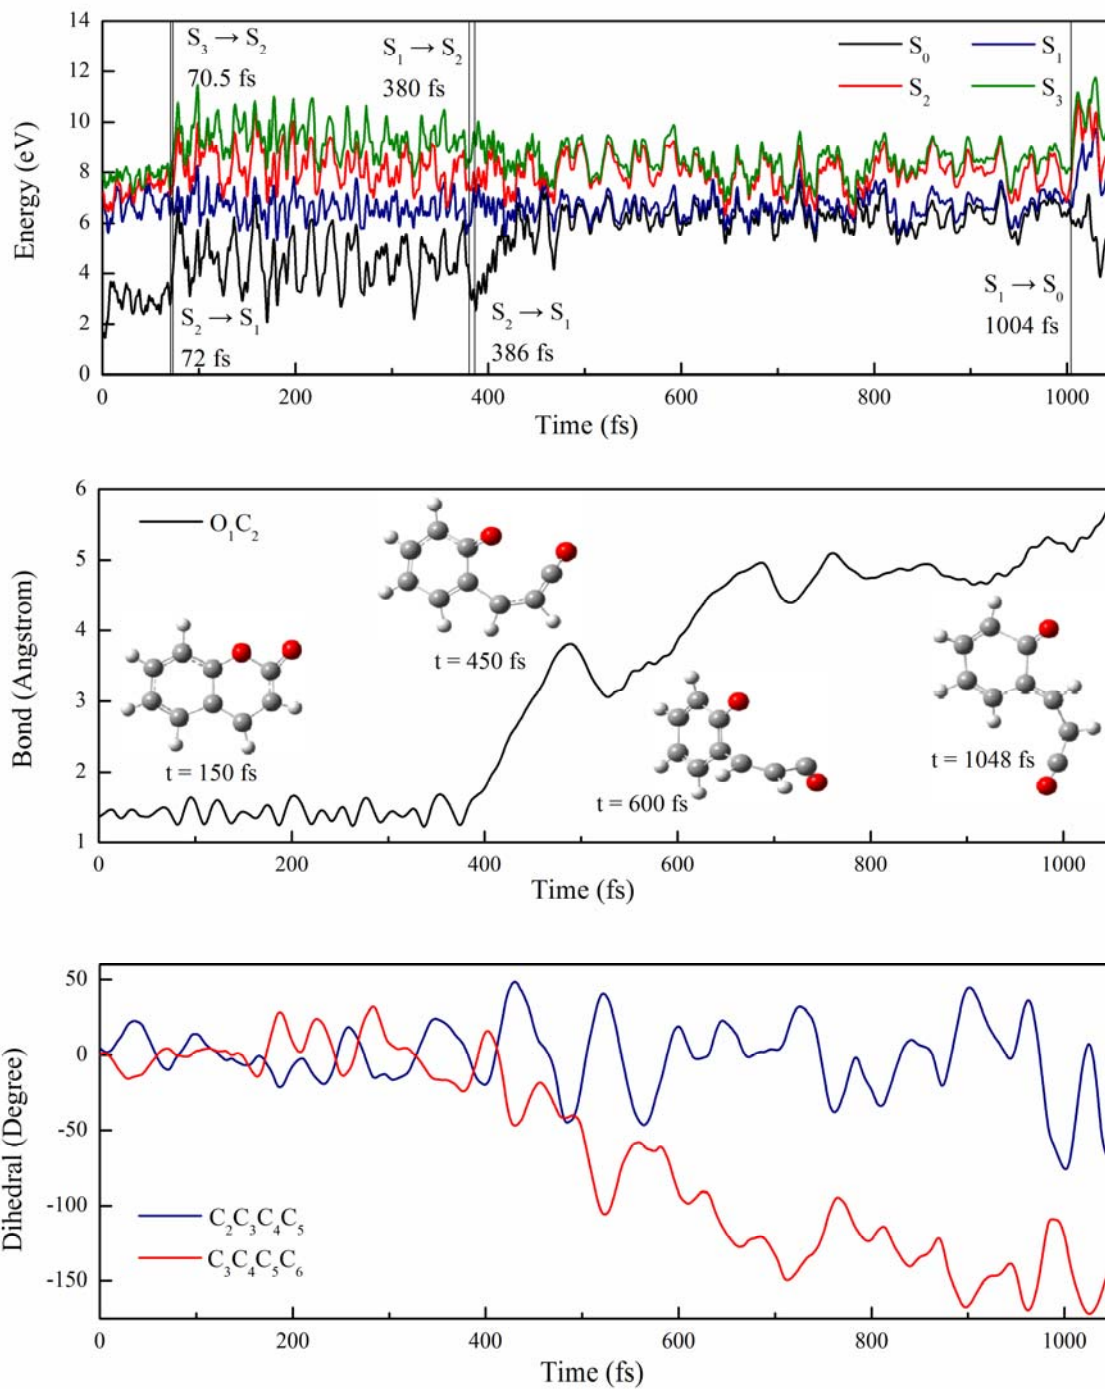

**Fig. S5** The same as Fig. S1 except for the trajectory to evolve  $S_3(\pi\pi^*L_b) \rightarrow S_3/S_2 \rightarrow S_2/S_1 \rightarrow S_1(\pi\pi^*L_a) \rightarrow TS_1(E) \rightarrow S_1(E) \rightarrow S_1(E)/S_0(E) \rightarrow S_0(E)$  (see Fig.6).

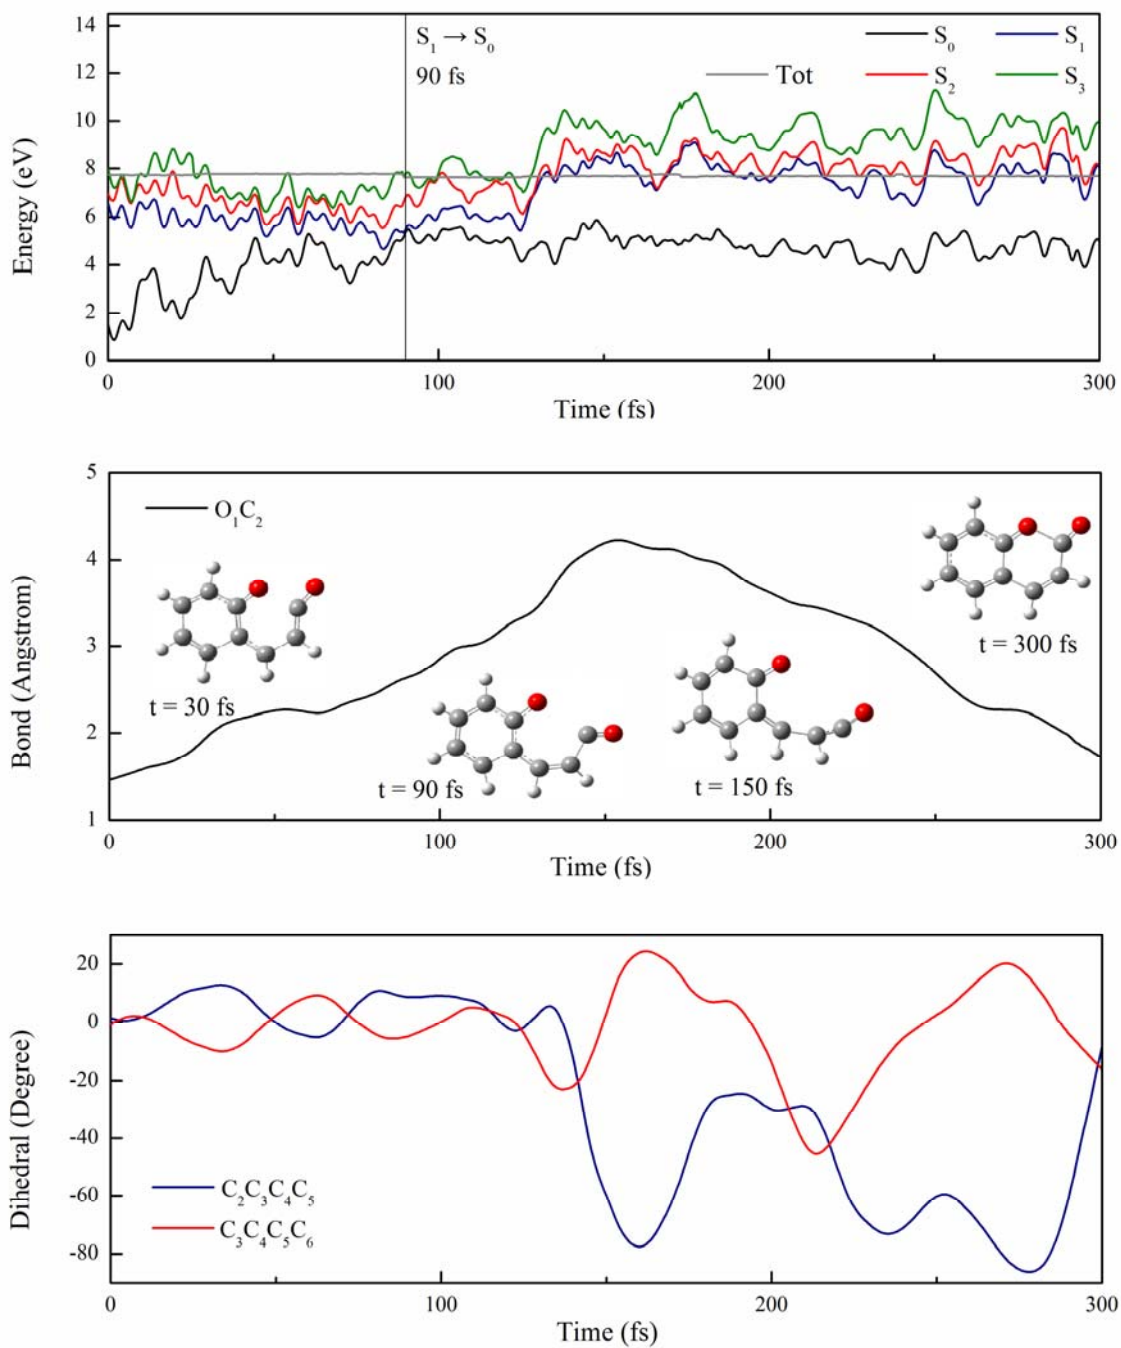

**Fig. S6** The same as Fig. S1 except for the trajectory starting from  $S_1(\pi\pi^*L_a)$  state to evolve  $S_1(\pi\pi^*L_a) \rightarrow S_1(\pi\pi^*L_a)/S_0 \rightarrow S_0$ .



Table S2. Cartesian coordinates (in angstrom) of all geometries optimized at the SA4-CASSCF (12, 10) /6-31G\* level.

Table S1.1:  $(S_0)_{\min}$

|   | X           | Y           | Z           |
|---|-------------|-------------|-------------|
| C | -2.85367460 | 0.37016600  | 0.00033860  |
| C | -1.80119750 | 1.26856450  | 0.00032090  |
| C | -0.47302070 | 0.80637460  | -0.00015950 |
| C | -0.24136750 | -0.55745030 | -0.00041790 |
| C | -1.29370060 | -1.47119330 | -0.00050720 |
| C | -2.58509590 | -1.00860120 | -0.00018000 |
| H | 0.52092600  | 2.74208550  | -0.00008500 |
| H | -3.86835730 | 0.72226810  | 0.00079120  |
| H | -1.98662610 | 2.32765530  | 0.00068210  |
| C | 0.67376680  | 1.67775580  | -0.00020330 |
| H | -1.06889550 | -2.52098450 | -0.00103510 |
| H | -3.39941280 | -1.70999650 | -0.00027290 |
| C | 2.14040330  | -0.28444050 | 0.00038740  |
| C | 1.91634370  | 1.16610220  | -0.00006960 |
| H | 2.79832220  | 1.77495850  | 0.00041260  |
| O | 1.01703260  | -1.06076860 | -0.00088450 |
| O | 3.20350990  | -0.81065660 | 0.00135320  |

Table S1.2:  $TS_0$  (Z)

|   | X           | Y           | Z           |
|---|-------------|-------------|-------------|
| C | -2.70827060 | -0.97733390 | 0.33825300  |
| C | -1.46396070 | -1.46439430 | 0.09982630  |
| C | -0.32276060 | -0.58554010 | -0.17954890 |
| C | -0.59295780 | 0.88859460  | -0.20002380 |
| C | -1.98173600 | 1.33929850  | 0.10406540  |
| C | -2.95371600 | 0.48151610  | 0.34733840  |
| H | 0.91167550  | -2.23699950 | -0.44690870 |
| H | -3.52984440 | -1.64151420 | 0.53164800  |
| H | -1.29099350 | -2.52518170 | 0.09517610  |
| C | 0.88779630  | -1.15887250 | -0.45179600 |
| H | -2.13465380 | 2.40252030  | 0.10051530  |
| H | -3.95053880 | 0.82710210  | 0.55706670  |
| C | 2.96894910  | -0.06476530 | 0.17818230  |
| C | 2.17848710  | -0.49208650 | -0.76469230 |
| H | 2.49283410  | -0.34595560 | -1.78022280 |
| O | 0.25155440  | 1.71187900  | -0.48052480 |
| O | 3.64654480  | 0.28473900  | 1.05554470  |

Table S1.3: TS<sub>0</sub>(E)

|   | X           | Y           | Z           |
|---|-------------|-------------|-------------|
| C | -2.26638320 | 0.58540530  | -0.64719610 |
| C | -1.18422570 | 1.21337740  | -0.05841030 |
| C | -0.27331430 | 0.52342220  | 0.71462250  |
| C | -0.45793040 | -0.92808130 | 0.93078230  |
| C | -1.62060160 | -1.55106130 | 0.28028720  |
| C | -2.48485940 | -0.81080910 | -0.47690990 |
| C | 0.90160310  | 1.18663980  | 1.31844470  |
| C | 2.41804430  | 0.65180440  | -0.52950030 |
| C | 2.17433860  | 1.16920290  | 0.68436390  |
| O | 0.30518230  | -1.57390230 | 1.60484690  |
| O | 2.67645670  | 0.22652880  | -1.59164310 |
| H | 0.84839570  | 1.52646280  | 2.33438170  |
| H | -2.95058810 | 1.15695650  | -1.24645430 |
| H | -1.04131940 | 2.26824810  | -0.21163850 |
| H | -1.74604750 | -2.60627610 | 0.43172450  |
| H | -3.33082890 | -1.27375800 | -0.95054940 |
| H | 3.03785080  | 1.58017230  | 1.17390580  |

Table S1.4: S<sub>0</sub>(Z)

|   | X           | Y           | Z           |
|---|-------------|-------------|-------------|
| C | -2.79685470 | 0.45274490  | 0.00003010  |
| C | -1.71883330 | 1.25758820  | 0.00181310  |
| C | -0.34292200 | 0.72589650  | 0.00226260  |
| C | -0.19342120 | -0.77034450 | 0.00066970  |
| C | -1.43981690 | -1.57681640 | -0.00123510 |
| C | -2.63645570 | -1.01100570 | -0.00156050 |
| H | 0.44525700  | 2.62753670  | 0.00521360  |
| H | -3.78955560 | 0.86340450  | -0.00024760 |
| H | -1.83856150 | 2.32661090  | 0.00296970  |
| C | 0.68326920  | 1.57632200  | 0.00424520  |
| H | -1.30706660 | -2.64298390 | -0.00238900 |
| H | -3.52422110 | -1.61865470 | -0.00300740 |
| C | 3.01767640  | 2.21396000  | 0.00696720  |
| C | 2.09795880  | 1.25755920  | 0.00479080  |
| H | 2.44910050  | 0.24808820  | 0.00345090  |
| O | 0.89176640  | -1.33107960 | 0.00088060  |
| O | 3.82661600  | 3.03933470  | 0.00887890  |

Table S1.5:  $S_0$  (E)

|   | X           | Y           | Z           |
|---|-------------|-------------|-------------|
| C | -2.90582800 | 0.30449360  | 0.00346100  |
| C | -1.88465690 | 1.19588190  | 0.00482720  |
| C | -0.48891540 | 0.76184320  | 0.00210440  |
| C | -0.22651050 | -0.70926170 | 0.00028990  |
| C | -1.40607420 | -1.61921690 | -0.00192640 |
| C | -2.63883520 | -1.14894480 | -0.00078690 |
| H | 1.55103240  | 1.11277290  | 0.00163890  |
| H | -3.92524850 | 0.64231960  | 0.00617230  |
| H | -2.11367660 | 2.24352770  | 0.00912290  |
| C | 0.59289550  | 1.59510120  | 0.00131660  |
| H | -1.18725160 | -2.67100950 | -0.00455240 |
| H | -3.48099740 | -1.81811840 | -0.00253380 |
| C | -0.28094790 | 3.94086590  | -0.02149770 |
| C | 0.68750150  | 3.05462640  | 0.00033670  |
| H | 1.66714990  | 3.49336820  | 0.01703720  |
| O | 0.89514250  | -1.17235980 | 0.00006580  |
| O | -1.09728940 | 4.75820920  | -0.04064220 |

Table S1.6:  $S_1(\pi\pi^*L_a)_{\min}$ 

|   | X           | Y           | Z           |
|---|-------------|-------------|-------------|
| C | -2.85424740 | 0.46080290  | -0.04973160 |
| C | -1.71892980 | 1.17835950  | -0.00881600 |
| C | -0.42275640 | 0.55848460  | 0.05674030  |
| C | -0.37377440 | -0.89799550 | 0.10230180  |
| C | -1.64535430 | -1.62617270 | 0.03213800  |
| C | -2.81388790 | -0.98340430 | -0.03500600 |
| H | 0.42806860  | 2.48034080  | 0.07956780  |
| H | -3.80635780 | 0.95721690  | -0.09871750 |
| H | -1.76545010 | 2.25234050  | -0.02743990 |
| C | 0.71585490  | 1.44309610  | 0.05837980  |
| H | -1.57744490 | -2.69785410 | 0.05803550  |
| H | -3.73841880 | -1.53116100 | -0.07746390 |
| C | 2.83138560  | 0.02907840  | -0.08382590 |
| C | 2.07522660  | 1.26464180  | -0.00323360 |
| H | 2.67700120  | 2.16039370  | 0.01115900  |
| O | 0.67945900  | -1.52844330 | 0.21960460  |
| O | 4.00858190  | -0.08788530 | -0.23322140 |

Table S1.7: TS<sub>1</sub> (Z)

|   | X           | Y           | Z           |
|---|-------------|-------------|-------------|
| C | -2.73853680 | -0.94741430 | 0.35698290  |
| C | -1.49197580 | -1.44555400 | 0.10294530  |
| C | -0.38921050 | -0.60949120 | -0.18826440 |
| C | -0.66595960 | 0.77735860  | -0.21399070 |
| C | -1.92699660 | 1.30101490  | 0.03179700  |
| C | -2.97563180 | 0.43767080  | 0.32553130  |
| H | 0.97988930  | -2.25139000 | -0.41214370 |
| H | -3.54551650 | -1.62329640 | 0.58423080  |
| H | -1.32630860 | -2.50904080 | 0.13288370  |
| C | 0.90827940  | -1.17848510 | -0.42262500 |
| H | -2.06911560 | 2.36608480  | 0.01375470  |
| H | -3.95369070 | 0.82826840  | 0.53523750  |
| C | 2.95768950  | -0.03681670 | 0.19382450  |
| C | 2.12137980  | -0.39616690 | -0.75168100 |
| H | 2.39832650  | -0.12411120 | -1.75266550 |
| O | 0.38074650  | 1.69638210  | -0.43633820 |
| O | 3.67931670  | 0.26954240  | 1.02520030  |

Table S1.8: TS<sub>1</sub> (E)

|   | X           | Y           | Z           |
|---|-------------|-------------|-------------|
| C | -2.23069850 | 0.58020550  | -0.68463800 |
| C | -1.16926200 | 1.23327710  | -0.06051740 |
| C | -0.28885080 | 0.49663850  | 0.73419010  |
| C | -0.51468290 | -0.85827840 | 0.92030160  |
| C | -1.56067670 | -1.52871930 | 0.28902940  |
| C | -2.40804990 | -0.79343370 | -0.51315390 |
| C | 0.95724930  | 0.97270560  | 1.40254330  |
| C | 2.32690050  | 0.66587670  | -0.57383950 |
| C | 2.19845470  | 1.08004850  | 0.67028080  |
| O | 0.35205900  | -1.46148720 | 1.75106220  |
| O | 2.39378830  | 0.39660950  | -1.68750160 |
| H | 0.89533070  | 1.50503540  | 2.32941540  |
| H | -2.90607850 | 1.13169640  | -1.31139340 |
| H | -1.01862300 | 2.28898150  | -0.20090260 |
| H | -1.69593220 | -2.58517020 | 0.43221500  |
| H | -3.21593270 | -1.29009640 | -1.02124950 |
| H | 3.08052090  | 1.49519310  | 1.12302900  |

Table S1.9:  $S_1$  (Z)

|   | X           | Y           | Z           |
|---|-------------|-------------|-------------|
| C | -2.82192220 | 0.40751920  | -0.00043770 |
| C | -1.71925040 | 1.20337080  | 0.00128990  |
| C | -0.39443350 | 0.67610070  | 0.00204120  |
| C | -0.30382190 | -0.71271110 | 0.00105450  |
| C | -1.43209050 | -1.54612900 | -0.00083370 |
| C | -2.67896790 | -0.99330370 | -0.00159300 |
| H | 0.45494680  | 2.64518950  | 0.00677130  |
| H | -3.80292200 | 0.84627630  | -0.00087530 |
| H | -1.83436780 | 2.27262870  | 0.00216460  |
| C | 0.71798310  | 1.60412400  | 0.00417180  |
| H | -1.29144680 | -2.61131080 | -0.00144610 |
| H | -3.54708060 | -1.62641960 | -0.00301960 |
| C | 3.06885290  | 2.21996490  | 0.00742300  |
| C | 2.11222070  | 1.28440720  | 0.00388110  |
| H | 2.47976070  | 0.27864120  | 0.00130330  |
| O | 0.91140960  | -1.33936040 | 0.00205230  |
| O | 3.90506560  | 3.02917300  | 0.00978530  |

Table S1.10:  $S_1$  (E)

|   | X           | Y           | Z           |
|---|-------------|-------------|-------------|
| C | -2.80236560 | 0.15866570  | 0.44885850  |
| C | -1.74260120 | 1.03803240  | 0.59200530  |
| C | -0.41916110 | 0.67591220  | 0.23738210  |
| C | -0.26569460 | -0.63470200 | -0.27011050 |
| C | -1.31788260 | -1.52106720 | -0.41503110 |
| C | -2.58616130 | -1.12986070 | -0.05908690 |
| H | 1.69976360  | 1.09550500  | 0.25072030  |
| H | -3.79174980 | 0.46523640  | 0.73409480  |
| H | -1.93106170 | 2.00895710  | 1.00680910  |
| C | 0.72987970  | 1.53056540  | 0.38289550  |
| H | -1.12842020 | -2.50245220 | -0.80981080 |
| H | -3.40749490 | -1.81325780 | -0.17156950 |
| C | -0.23648960 | 3.81247310  | 0.53258450  |
| C | 0.74437080  | 2.95165340  | 0.68421560  |
| H | 1.66356420  | 3.39762970  | 1.01495870  |
| O | 0.98064330  | -1.06249700 | -0.65210610 |
| O | -1.08484530 | 4.59560580  | 0.43034360  |

Table S1.11:  $S_1(n\pi^*)_{\min}$ 

|   | X           | Y           | Z           |
|---|-------------|-------------|-------------|
| C | 2.84688060  | 0.34040790  | -0.00011380 |
| C | 1.82860130  | 1.24407190  | 0.00017390  |
| C | 0.47177830  | 0.82577900  | 0.00042640  |
| C | 0.23976950  | -0.54655510 | 0.00021280  |
| C | 1.28183950  | -1.48279630 | -0.00007880 |
| C | 2.57293400  | -1.04254240 | -0.00015840 |
| H | -0.49369940 | 2.79418410  | -0.00015010 |
| H | 3.86685610  | 0.67972290  | -0.00031330 |
| H | 2.03841620  | 2.29887330  | 0.00024710  |
| C | -0.64250010 | 1.73357930  | 0.00068300  |
| H | 1.03823770  | -2.52879470 | -0.00002650 |
| H | 3.38203140  | -1.74960780 | -0.00027120 |
| C | -2.06809650 | -0.18315160 | -0.00022620 |
| C | -1.94898010 | 1.16470510  | 0.00009110  |
| H | -2.83517660 | 1.76872510  | -0.00065930 |
| O | -1.03077080 | -1.07448030 | 0.00047270  |
| O | -3.23678510 | -0.86673740 | -0.00068830 |

Table S1.12:  $S_3(\pi\pi^*L_b)_{\min}$ 

|   | X           | Y           | Z           |
|---|-------------|-------------|-------------|
| C | -2.87159320 | 0.39380390  | -0.00000030 |
| C | -1.82918460 | 1.31706510  | 0.00023950  |
| C | -0.45112810 | 0.88118420  | 0.00019510  |
| C | -0.21149550 | -0.58953930 | -0.00009570 |
| C | -1.28452260 | -1.48091200 | -0.00031040 |
| C | -2.56921150 | -1.03275780 | -0.00027360 |
| H | 0.49428840  | 2.75661750  | 0.00057240  |
| H | -3.89081360 | 0.72670840  | 0.00001280  |
| H | -2.02922450 | 2.37277400  | 0.00044430  |
| C | 0.60978300  | 1.68745360  | 0.00035540  |
| H | -1.06521740 | -2.53276850 | -0.00048270 |
| H | -3.38140460 | -1.73443860 | -0.00046090 |
| C | 2.14352160  | -0.26898250 | 0.00001940  |
| C | 1.95064180  | 1.12250420  | 0.00026740  |
| H | 2.82021660  | 1.74527750  | 0.00014150  |
| O | 1.04097290  | -1.08901550 | 0.00000000  |
| O | 3.22332720  | -0.84313500 | -0.00015330 |

Table S1.13:  $S_3(\pi\pi^*L_b)/S_2(\pi\pi^*L_a)$ 

|   | X           | Y           | Z           |
|---|-------------|-------------|-------------|
| C | -2.87721350 | 0.41612949  | -0.00009631 |
| C | -1.83255491 | 1.32041113  | 0.00104410  |
| C | -0.46135247 | 0.88024605  | 0.00109719  |
| C | -0.20766480 | -0.61104546 | 0.00178064  |
| C | -1.27626267 | -1.48672159 | -0.00050966 |
| C | -2.56305640 | -1.03019893 | -0.00134694 |
| H | 0.48244516  | 2.75222354  | 0.00020176  |
| H | -3.89696996 | 0.74443404  | -0.00013163 |
| H | -2.01931817 | 2.37968266  | 0.00171822  |
| C | 0.59395568  | 1.68205513  | 0.00020917  |
| H | -1.07067978 | -2.54171931 | -0.00137074 |
| H | -3.37606406 | -1.73095000 | -0.00295220 |
| C | 2.14402992  | -0.27929082 | 0.00075406  |
| C | 1.94609311  | 1.11806860  | -0.00061662 |
| H | 2.81280460  | 1.74418221  | -0.00261039 |
| O | 1.06148245  | -1.10813342 | 0.00523799  |
| O | 3.23928170  | -0.81753412 | -0.00193774 |

Table S1.14:  $S_3(\pi\pi^*L_b)/S_2(n\pi^*)$ 

|   | X           | Y           | Z           |
|---|-------------|-------------|-------------|
| C | -2.86598350 | 0.38334090  | -0.00034490 |
| C | -1.81574500 | 1.33067750  | -0.00098310 |
| C | -0.42116000 | 0.90082300  | -0.00079140 |
| C | -0.17079100 | -0.59305190 | -0.00132400 |
| C | -1.26557630 | -1.49180250 | 0.00033880  |
| C | -2.53694550 | -1.04583140 | 0.00082470  |
| H | 0.49447080  | 2.78022620  | 0.00152380  |
| H | -3.88817340 | 0.70314460  | -0.00051630 |
| H | -2.02220910 | 2.38426770  | -0.00116680 |
| C | 0.61841130  | 1.71177130  | 0.00061900  |
| H | -1.04767630 | -2.54400660 | 0.00091310  |
| H | -3.34597060 | -1.75216550 | 0.00205010  |
| C | 2.20249490  | -0.24956990 | -0.00094640 |
| C | 1.96436070  | 1.16118890  | 0.00146930  |
| H | 2.82899140  | 1.79125440  | 0.00377610  |
| O | 1.07025500  | -1.10118850 | -0.00409060 |
| O | 3.27097080  | -0.78201290 | -0.00086570 |

Table S1.15:  $S_2(n\pi^*)/S_1(\pi\pi^*L_a)$ 

|   | X           | Y           | Z           |
|---|-------------|-------------|-------------|
| C | 2.84426390  | 0.36728970  | 0.00035150  |
| C | 1.84511420  | 1.25981920  | 0.00017200  |
| C | 0.46010700  | 0.83865110  | -0.00050520 |
| C | 0.21368070  | -0.58120970 | -0.00034370 |
| C | 1.30249240  | -1.50985750 | -0.00026090 |
| C | 2.56596860  | -1.05186180 | -0.00002560 |
| H | -0.46226380 | 2.77348550  | 0.00002530  |
| H | 3.86752210  | 0.69460190  | 0.00085340  |
| H | 2.04759230  | 2.31538140  | 0.00051270  |
| C | -0.61692950 | 1.71244650  | -0.00101680 |
| H | 1.07058820  | -2.55802650 | -0.00078490 |
| H | 3.38853900  | -1.74300480 | -0.00020090 |
| C | -2.21104500 | -0.16451370 | 0.00008600  |
| C | -1.97421820 | 1.17198340  | -0.00053780 |
| H | -2.82371780 | 1.82423110  | 0.00109670  |
| O | -0.98411230 | -1.09154760 | -0.00119240 |
| O | -3.22224550 | -0.88248570 | 0.00139190  |

Table S1.16:  $S_1(\pi\pi^*L_a)/S_0$ 

|   | X           | Y           | Z           |
|---|-------------|-------------|-------------|
| C | -2.86240270 | 0.45540380  | -0.11075890 |
| C | -1.70488110 | 1.19424470  | -0.03347580 |
| C | -0.42287370 | 0.58321020  | 0.08378750  |
| C | -0.36879090 | -0.90354490 | 0.22251410  |
| C | -1.64695330 | -1.63561620 | 0.08808130  |
| C | -2.80508600 | -1.00117150 | -0.05994550 |
| H | 0.44846820  | 2.48771330  | 0.19880230  |
| H | -3.81336400 | 0.94164350  | -0.21666300 |
| H | -1.75953120 | 2.26660470  | -0.08519950 |
| C | 0.71973800  | 1.44898950  | 0.11147190  |
| H | -1.57493190 | -2.70547150 | 0.14258130  |
| H | -3.72440400 | -1.55347390 | -0.13844790 |
| C | 2.81840220  | 0.03771570  | -0.24257370 |
| C | 2.07831890  | 1.25856930  | 0.00006440  |
| H | 2.69622370  | 2.13800830  | 0.06731040  |
| O | 0.64648300  | -1.49313900 | 0.46349070  |
| O | 3.97454070  | -0.08784680 | -0.49056850 |



Table S1.17:  $S_1(n\pi^*)/S_0$ 

|   | X           | Y           | Z           |
|---|-------------|-------------|-------------|
| C | 2.85517641  | 0.32398644  | -0.03116405 |
| C | 1.87711523  | 1.26395175  | 0.02318275  |
| C | 0.49796974  | 0.89888467  | 0.00738420  |
| C | 0.22648740  | -0.47122445 | -0.02017171 |
| C | 1.23278160  | -1.45241184 | -0.07971927 |
| C | 2.53158511  | -1.05453174 | -0.09237464 |
| H | -0.54828923 | 2.66914982  | 0.73881310  |
| H | 3.88814825  | 0.62236663  | -0.02967227 |
| H | 2.12573913  | 2.30963728  | 0.06668298  |
| C | -0.59139508 | 1.84354247  | 0.04991346  |
| H | 0.95192216  | -2.48849461 | -0.10380410 |
| H | 3.31766037  | -1.78565796 | -0.13598780 |
| C | -2.02157356 | -0.02586351 | -0.21067922 |
| C | -1.92962757 | 1.25602087  | -0.36278894 |
| H | -2.66284407 | 1.82568824  | -0.89020381 |
| O | -1.06437729 | -0.92277695 | 0.16579143  |
| O | -2.79687403 | -1.12577468 | -0.66447537 |

Table S1.18:  $[S_1(Z)/S_0(Z)]$ 

|   | X           | Y           | Z           |
|---|-------------|-------------|-------------|
| C | -2.68607430 | -0.90622870 | -0.11273120 |
| C | -1.36923430 | -1.37381630 | -0.14369650 |
| C | -0.33409800 | -0.48985190 | 0.13571840  |
| C | -0.62522590 | 0.83173810  | 0.44604880  |
| C | -1.93018190 | 1.31799530  | 0.45932410  |
| C | -2.95390920 | 0.41876050  | 0.18382990  |
| H | 1.56546670  | -1.22361240 | 1.00508340  |
| H | -3.49583630 | -1.57894510 | -0.32923440 |
| H | -1.15977460 | -2.40041140 | -0.38612670 |
| C | 1.13181380  | -0.75203620 | 0.14146020  |
| H | -2.12999480 | 2.34876500  | 0.68571650  |
| H | -3.97218870 | 0.76383030  | 0.19722270  |
| C | 3.12112180  | -1.20892200 | -1.16512970 |
| C | 1.89004500  | -0.74872320 | -1.08200100 |
| H | 1.48298910  | -0.33575830 | -1.98450430 |
| O | 0.44985420  | 1.57470160  | 0.73716280  |
| O | 4.19826100  | -1.61993480 | -1.24073230 |

Table S1.19:  $[S_1(E)/S_0(E)]$ 

|   | X           | Y           | Z           |
|---|-------------|-------------|-------------|
| C | -2.81814120 | -0.97078200 | 0.25809380  |
| C | -1.61194620 | -1.55574520 | -0.08316310 |
| C | -0.49193020 | -0.75293030 | -0.25576850 |
| C | -0.59705120 | 0.62201870  | -0.10381470 |
| C | -1.79832950 | 1.23287120  | 0.27194760  |
| C | -2.91060310 | 0.41376220  | 0.43577820  |
| H | 1.15793440  | -1.37677370 | -1.60570390 |
| H | -3.68916160 | -1.58395730 | 0.40058820  |
| H | -1.53952580 | -2.62219470 | -0.20563310 |
| C | 0.90269210  | -1.16040500 | -0.58409710 |
| H | -1.85293790 | 2.29668570  | 0.40888500  |
| H | -3.85351190 | 0.85044690  | 0.71077420  |
| C | 1.46317880  | -1.80572050 | 1.69296670  |
| C | 1.79605990  | -1.67533570 | 0.42338680  |
| H | 2.80232230  | -1.96445350 | 0.17680390  |
| O | 0.52510870  | 1.29169130  | -0.36444230 |
| O | 1.20180050  | -1.94430840 | 2.79645230  |
